# Supplementary material for: Early-life environmental enrichment generates persistent individualized behavior in mice
Source: PubMed Central journal article supplement — Sci Adv. 2020 Aug 26;6(35):eabb1478. doi: 10.1126/sciadv.abb1478 (PMC7449688; doi:10.1126/sciadv.abb1478), 2020-08-26
Supplement: abb1478_SM.pdf [file abb1478_SM.pdf]

## Supplementary Materials for

### **Early-life environmental enrichment generates persistent individualized behavior in mice**

Sara Zocher, Susan Schilling, Anna N. Grzyb, Vijay S. Adusumilli, Jadna Bogado Lopes, Sandra Günther, Rupert W. Overall, York Winter, Gerd Kempermann\*

\*Corresponding author. Email: [gerd.kempermann@dzne.de](mailto:gerd.kempermann@dzne.de)

Published 26 August 2020, *Sci. Adv.* **6**, eabb1478 (2020)  
DOI: [10.1126/sciadv.abb1478](https://doi.org/10.1126/sciadv.abb1478)

#### **The PDF file includes:**

Figs. S1 to S5  
Tables S1 to S3  
Legends for data files S1 to S3

#### **Other Supplementary Material for this manuscript includes the following:**

(available at [advances.sciencemag.org/cgi/content/full/6/35/eabb1478/DC1](https://advances.sciencemag.org/cgi/content/full/6/35/eabb1478/DC1))

Data files S1 to S3

## Supplementary Figures

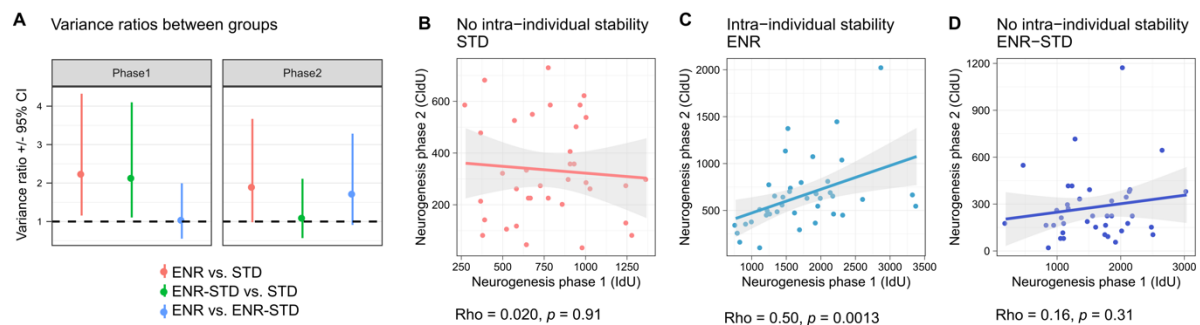

**Fig. S1:** ENR stabilized individual levels of adult hippocampal neurogenesis during aging. **A**, Pairwise variance ratios of adult hippocampal neurogenesis with 95 % confidence intervals (CI). Dashed line at unity indicates no differences in variance between the two groups. **B-D**, Correlations of individual levels of adult hippocampal neurogenesis between phase 1 and phase 2 (IdU vs CIdU) in mice separated by groups. Depicted are Spearman's rho and  $p$ -value of the rank correlation. ( $n = 36$  (STD); 39 (ENR); 40 (ENR-STD)). Figure refers to content in Figure 3.

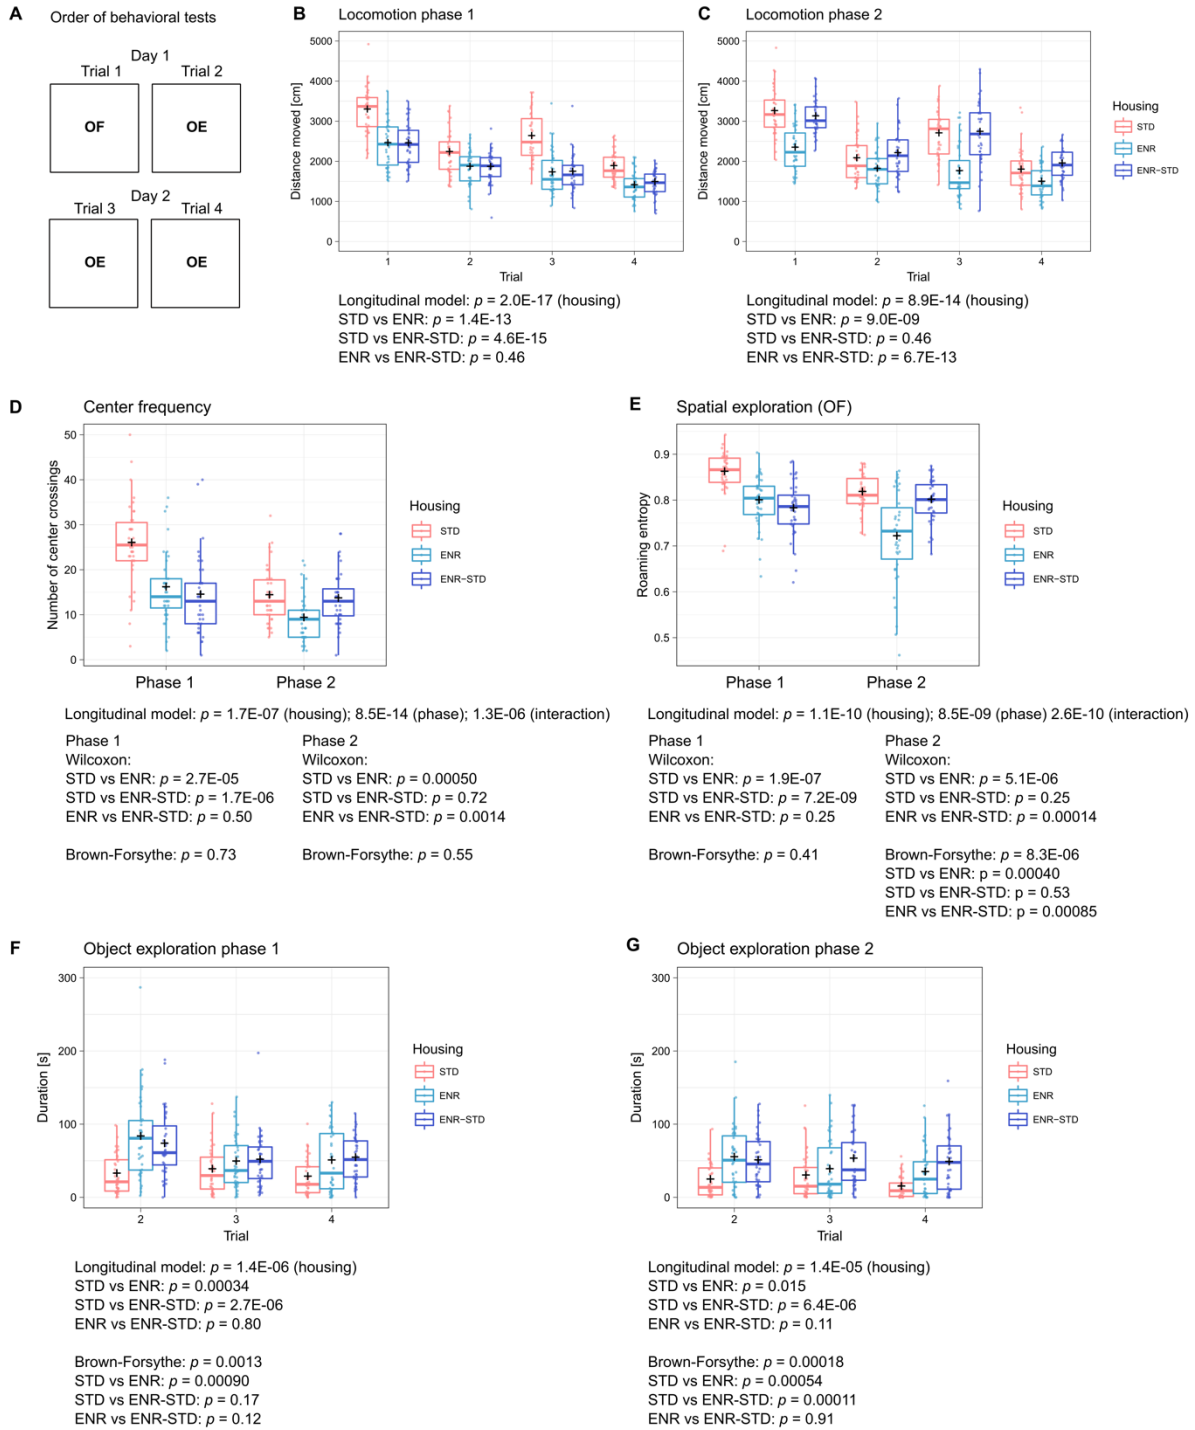

**Fig. S2:** Results of cross-sectional behavioral testing. ENR-induced behavioral changes in the open field are plastic towards environmental stimulation and reversed after withdrawal from ENR, while ENR-induced changes in object exploration are maintained after environmental change. **A**, Timeline for behavioral testing in phases 1 and 2. One trial of open field (OF) test and three trials of object exploration (OE) test were performed in the same arena on two consecutive days. **B**, Locomotion during individual trials of OF and OE tests. At the end of phase 1, ENR and ENR-STD mice traveled shorter distances compared to STD mice. **C**, At the end of phase 2, ENR mice maintained reduced levels of locomotion in OF and OE tests, while ENR-STD mice traveled distances similar to STD mice. **D**, ENR decreased the frequency of center passage in OF test. Decrease in frequency of center passage was not maintained in ENR-STD after withdrawal from ENR. **E**, ENR mice showed reduced roaming entropy in the open field compared to STD mice. Withdrawal from ENR increased roaming entropy in the open field to the levels observed in STD mice, while ENR mice showed reduced means and higher variances. **F-G**, Object exploration during all three trials of the OE test in phase 1 and phase 2. ( $n = 38$  (STD);  $39$  (ENR);  $40$  (ENR-

STD)). Depicted  $p$  - values from Brown-Forsythe tests refer to housing effects. See Supplementary data 1 for detailed statistical results.  
Figure refers to content in Figure 4.

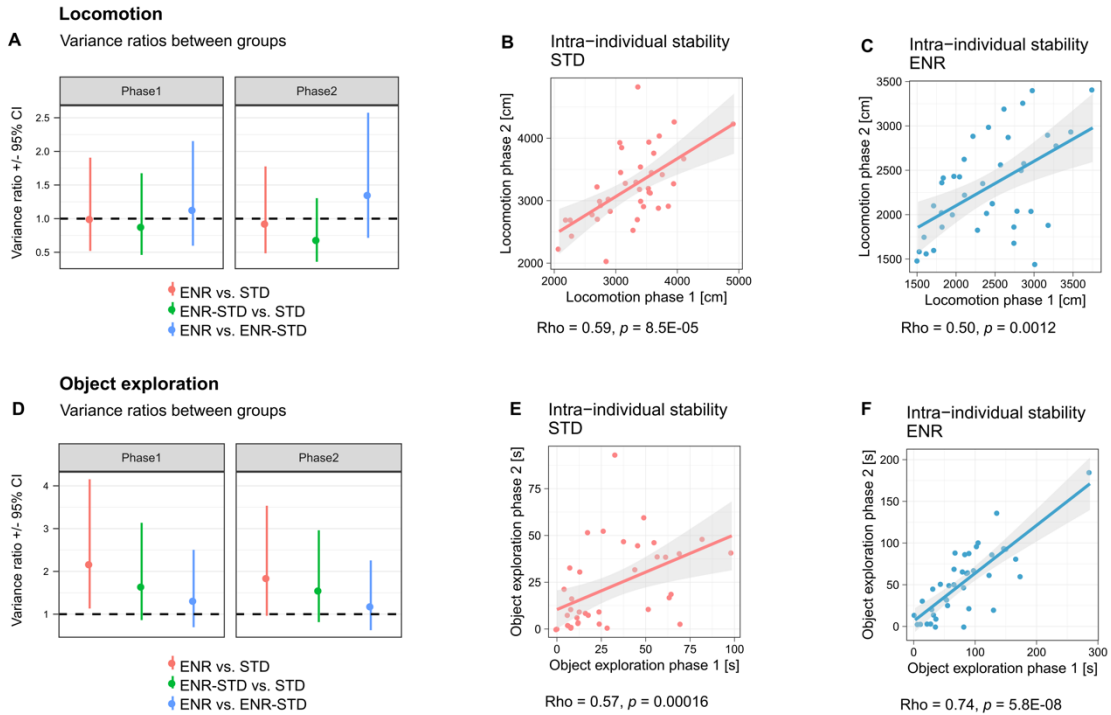

**Fig. S3:** Variance ratios and intra-individual stability of object exploration and locomotion. **A**, Confidence intervals (CI, 95 %) for pairwise variance ratios of locomotion in the open field test. Dashed line at unity indicates no difference between groups. **B-C**, Correlations of individual locomotion in open field test between phase 1 and phase 2. **D**, Confidence intervals for variance ratios of object exploration (time around objects). **E-F**, Correlations of object exploration in the first trial of the object exploration test between phase 1 and phase 2. Depicted are Spearman's rho and  $p$  - values of the rank correlation. ( $n = 38$  (STD); 39 (ENR); 40 (ENR-STD)). Figure refers to content in Figure 4.

Spearman's correlations between behaviors and hippocampal neurogenesis

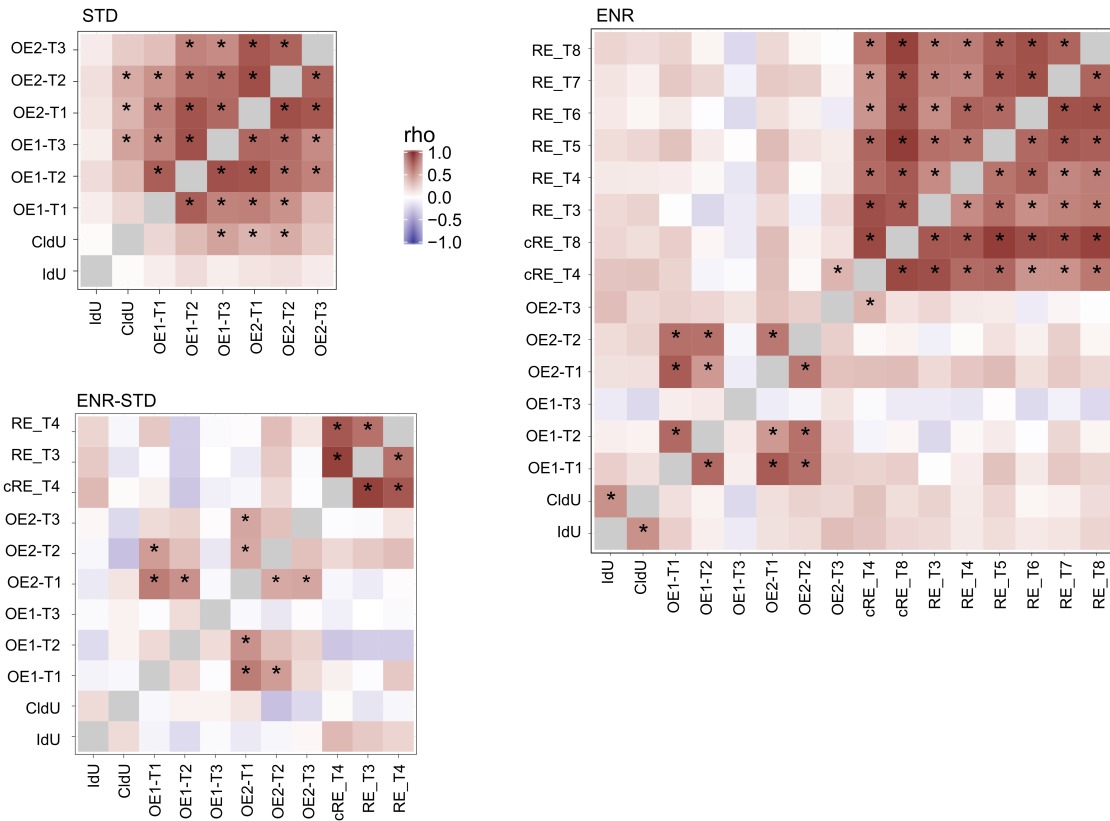

**Fig. S4:** Associations between exploratory behavior and adult hippocampal neurogenesis. Depicted are matrices of Spearman's correlations between behavioral traits and adult neurogenesis in STD, ENR and ENR-STD mice. Asterisks highlight significant correlations with  $p < 0.05$ . OE1-T1/2/3 – object exploration phase 1 trial 1/2/3, OE2-T1/2/3 – object exploration phase 2 trial 1/2/3, RE\_T1-T8 – roaming entropy in time blocks 3-8, cRE\_T4/8 – cumulative roaming entropy time blocks 4/8.

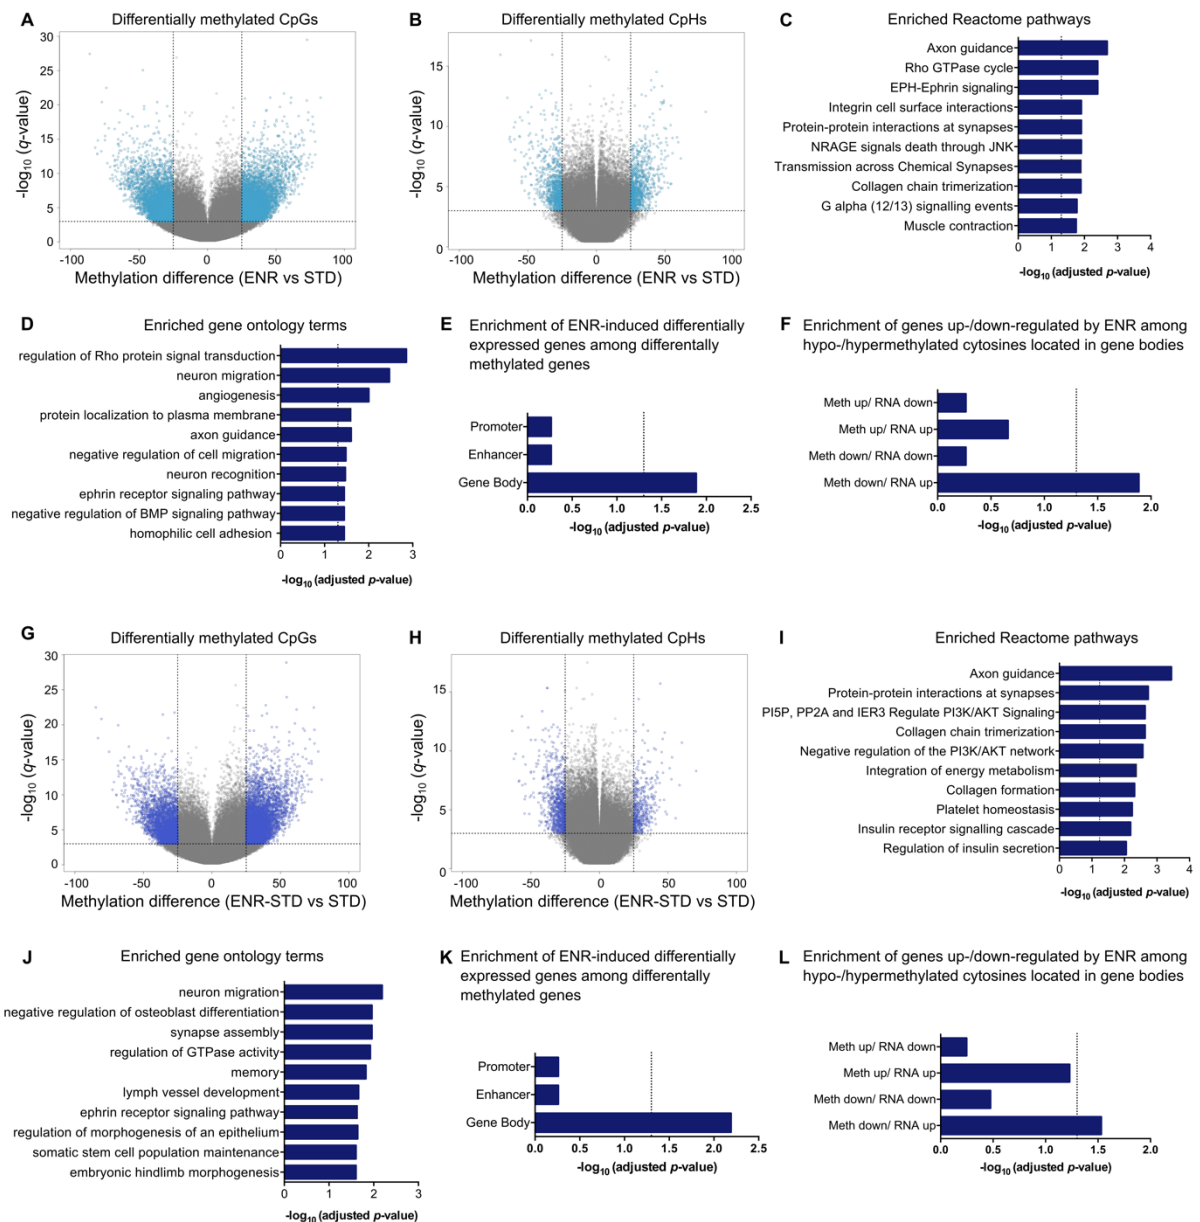

**Fig. S5:** DNA methylation differences between ENR and STD mice as well as ENR-STD and STD mice. **A-B**, Volcano plots depicting significantly differentially methylated CpGs and CpHs ( $q < 0.001$ , methylation difference  $> 25\%$ ) between ENR and STD mice in pale blue. **C-D**, Genes with ENR-induced differentially methylated cytosines (CpGs or CpHs) are enriched at neuronal plasticity pathways. **E**, Genes with previously reported ENR-induced gene expression changes in the dentate gyrus (21) are enriched among genes with ENR-induced differentially methylated cytosines located in gene bodies, but not among genes with ENR-induced promoter or enhancer methylation changes. **F**, Genes with ENR-induced hypomethylation (Meth down) of gene bodies, significantly overlap with transcripts upregulated (RNA up) by ENR. Depicted are results from hypergeometric testing. **G-H**, Significantly differentially methylated cytosines between ENR-STD and STD mice depicted in dark blue. **I-J**, Gene ontology and pathway enrichment of genes differentially methylated between ENR-STD and STD. **K-L**, Gene body methylation changes in ENR-STD mice were detected at genes with up-regulated expression after ENR.

Figure refers to content in Figure 5.

## Supplementary Tables

**Table S1:** Variance estimates from linear mixed models with 95 % confidence intervals.

| Phenotype                     | Housing | Vind  | Vind<br>CI low | Vind<br>CI up | Vres  | Vres<br>CI low | Vres<br>CI up | R    | R<br>CI low | R<br>CI up |
|-------------------------------|---------|-------|----------------|---------------|-------|----------------|---------------|------|-------------|------------|
| RE T1                         | ENR     | 0.00  | 0.00           | 0.14          | 0.99  | 0.81           | 1.19          | 0.00 | 0.00        | 0.13       |
| RE T2                         | ENR     | 0.14  | 0.00           | 0.33          | 0.45  | 0.33           | 0.64          | 0.26 | 0.03        | 0.46       |
| RE T3                         | ENR     | 0.10  | 0.05           | 0.19          | 0.51  | 0.44           | 0.58          | 0.19 | 0.09        | 0.38       |
| RE T4                         | ENR     | 0.14  | 0.07           | 0.24          | 0.66  | 0.59           | 0.74          | 0.22 | 0.11        | 0.37       |
| RE T5                         | ENR     | 0.20  | 0.11           | 0.34          | 0.63  | 0.56           | 0.71          | 0.30 | 0.18        | 0.56       |
| RE T6                         | ENR     | 0.28  | 0.15           | 0.48          | 0.84  | 0.75           | 0.93          | 0.33 | 0.19        | 0.59       |
| RE T7                         | ENR     | 0.12  | 0.06           | 0.23          | 0.75  | 0.67           | 0.84          | 0.17 | 0.08        | 0.31       |
| RE T8                         | ENR     | 0.23  | 0.14           | 0.42          | 0.81  | 0.71           | 0.91          | 0.30 | 0.16        | 0.52       |
| Neurogenesis                  | STD     | 0.00  | 0.00           | 0.03          | 0.11  | 0.08           | 0.16          | 0.01 | 0.00        | 0.23       |
| Neurogenesis                  | ENR     | 0.17  | 0.00           | 0.40          | 0.32  | 0.20           | 0.54          | 0.38 | 0.04        | 0.63       |
| Neurogenesis                  | ENR-STD | 0.01  | 0.00           | 0.16          | 0.36  | 0.24           | 0.52          | 0.02 | 0.00        | 0.34       |
| Locomotion                    | STD     | 15.07 | 7.35           | 29.55         | 9.84  | 6.45           | 16.29         | 0.64 | 0.39        | 0.79       |
| Locomotion                    | ENR     | 16.35 | 5.32           | 33.12         | 15.11 | 9.57           | 25.58         | 0.55 | 0.26        | 0.74       |
| Locomotion                    | ENR-STD | 0.52  | 0.00           | 9.36          | 17.01 | 11.07          | 25.15         | 0.02 | 0.00        | 0.39       |
| Initial object<br>exploration | STD     | 3.38  | 1.52           | 6.67          | 2.40  | 1.53           | 4.03          | 0.60 | 0.35        | 0.78       |
| Initial object<br>exploration | ENR     | 7.23  | 4.13           | 12.69         | 2.71  | 1.74           | 4.36          | 0.75 | 0.56        | 0.86       |
| Initial object<br>exploration | ENR-STD | 4.03  | 1.56           | 7.96          | 3.61  | 2.23           | 5.78          | 0.59 | 0.29        | 0.74       |

Vind – inter-individual variance component; Vres – residual variance component; R – repeatability; CI\_low – lower confidence interval; CI\_up – upper confidence interval.



**Table S2:** Comparison of models with heterogeneous inter-individual and residual variances with models assuming homogeneous variance. Reported are values of deviance information criterion (DIC) for the full and simplified models and the difference between simplified and full models. Reduction of  $\Delta$ DIC by at least 2 units suggests better fit to the data.

| Phenotype                  | Full model | Homogeneous Vind | $\Delta$ DIC (full – simpler model) | Homogeneous Vres | $\Delta$ DIC (full – simpler model) |
|----------------------------|------------|------------------|-------------------------------------|------------------|-------------------------------------|
| Neurogenesis               | 373.5      | 387.1            | 13.6                                | 380.1            | 6.6                                 |
| RE                         | 9856.9     | 9962.0           | 105.1                               | 9907.0           | 50.1                                |
| Locomotion                 | 1365.1     | 1369.9           | 4.9                                 | 1371.6           | 6.6                                 |
| Initial object exploration | 1017.2     | 1016.6           | -0.6                                | 1016.8           | -0.4                                |

Vind – inter-individual variance component; Vres – residual variance component.

**Table S3:** Posterior mode of inter-individual correlation of RE between time blocks with 95 % confidence intervals.

| Time blocks       | Pearson's r | Lower confidence interval | Upper confidence interval |
|-------------------|-------------|---------------------------|---------------------------|
| PeriodT1:PeriodT1 | 0.99903806  | 1                         | 1                         |
| PeriodT2:PeriodT1 | 0.1050056   | -0.6417686                | 0.76093968                |
| PeriodT3:PeriodT1 | 0.06890519  | -0.782984                 | 0.88019508                |
| PeriodT4:PeriodT1 | 0.06739862  | -0.7943345                | 0.85552608                |
| PeriodT5:PeriodT1 | -0.0353727  | -0.8474715                | 0.96942138                |
| PeriodT6:PeriodT1 | -0.1458702  | -0.9285464                | 0.86032641                |
| PeriodT7:PeriodT1 | -0.0286419  | -0.9233632                | 0.87755538                |
| PeriodT8:PeriodT1 | 0.04904015  | -0.8793511                | 0.91660039                |
| PeriodT1:PeriodT2 | 0.1050056   | -0.6417686                | 0.76093968                |
| PeriodT2:PeriodT2 | 0.99903806  | 1                         | 1                         |
| PeriodT3:PeriodT2 | 0.62675542  | 0.15179004                | 0.89196265                |
| PeriodT4:PeriodT2 | 0.27451313  | -0.1665017                | 0.75833962                |
| PeriodT5:PeriodT2 | 0.51584507  | 0.03470389                | 0.87748919                |
| PeriodT6:PeriodT2 | 0.2503437   | -0.1693521                | 0.79855866                |
| PeriodT7:PeriodT2 | 0.43645247  | -0.0507094                | 0.86714146                |
| PeriodT8:PeriodT2 | 0.43357102  | -0.0532153                | 0.84537966                |
| PeriodT1:PeriodT3 | 0.06890519  | -0.782984                 | 0.88019508                |
| PeriodT2:PeriodT3 | 0.62675542  | 0.15179004                | 0.89196265                |
| PeriodT3:PeriodT3 | 0.99903806  | 1                         | 1                         |
| PeriodT4:PeriodT3 | 0.67141489  | 0.32522859                | 0.8908061                 |
| PeriodT5:PeriodT3 | 0.86125272  | 0.61712202                | 0.97355785                |
| PeriodT6:PeriodT3 | 0.7469976   | 0.44112478                | 0.92995947                |
| PeriodT7:PeriodT3 | 0.80697785  | 0.52671953                | 0.96993771                |
| PeriodT8:PeriodT3 | 0.81531877  | 0.52616635                | 0.95047219                |
| PeriodT1:PeriodT4 | 0.06739862  | -0.7943345                | 0.85552608                |
| PeriodT2:PeriodT4 | 0.27451313  | -0.1665017                | 0.75833962                |
| PeriodT3:PeriodT4 | 0.67141489  | 0.32522859                | 0.8908061                 |
| PeriodT4:PeriodT4 | 0.99903806  | 1                         | 1                         |
| PeriodT5:PeriodT4 | 0.80075574  | 0.59216473                | 0.94572527                |
| PeriodT6:PeriodT4 | 0.81534247  | 0.58450869                | 0.94840719                |
| PeriodT7:PeriodT4 | 0.79930587  | 0.50348182                | 0.94713855                |
| PeriodT8:PeriodT4 | 0.78018085  | 0.53527346                | 0.93517763                |
| PeriodT1:PeriodT5 | -0.0353727  | -0.8474715                | 0.96942138                |
| PeriodT2:PeriodT5 | 0.51584507  | 0.03470389                | 0.87748919                |
| PeriodT3:PeriodT5 | 0.86125272  | 0.61712202                | 0.97355785                |
| PeriodT4:PeriodT5 | 0.80075574  | 0.59216473                | 0.94572527                |
| PeriodT5:PeriodT5 | 0.99903806  | 1                         | 1                         |
| PeriodT6:PeriodT5 | 0.89999346  | 0.73213161                | 0.97462696                |
| PeriodT7:PeriodT5 | 0.93310049  | 0.7656326                 | 0.98704948                |
| PeriodT8:PeriodT5 | 0.92159991  | 0.76446734                | 0.98884355                |
| PeriodT1:PeriodT6 | -0.1458702  | -0.9285464                | 0.86032641                |
| PeriodT2:PeriodT6 | 0.2503437   | -0.1693521                | 0.79855866                |
| PeriodT3:PeriodT6 | 0.7469976   | 0.44112478                | 0.92995947                |
| PeriodT4:PeriodT6 | 0.81534247  | 0.58450869                | 0.94840719                |
| PeriodT5:PeriodT6 | 0.89999346  | 0.73213161                | 0.97462696                |
| PeriodT6:PeriodT6 | 0.99903806  | 1                         | 1                         |
| PeriodT7:PeriodT6 | 0.9176525   | 0.77199618                | 0.98363845                |
| PeriodT8:PeriodT6 | 0.92546987  | 0.77807902                | 0.98505228                |
| PeriodT1:PeriodT7 | -0.0286419  | -0.9233632                | 0.87755538                |
| PeriodT2:PeriodT7 | 0.43645247  | -0.0507094                | 0.86714146                |
| PeriodT3:PeriodT7 | 0.80697785  | 0.52671953                | 0.96993771                |
| PeriodT4:PeriodT7 | 0.79930587  | 0.50348182                | 0.94713855                |
| PeriodT5:PeriodT7 | 0.93310049  | 0.7656326                 | 0.98704948                |
| PeriodT6:PeriodT7 | 0.9176525   | 0.77199618                | 0.98363845                |
| PeriodT7:PeriodT7 | 0.99903806  | 1                         | 1                         |
| PeriodT8:PeriodT7 | 0.91430631  | 0.73417398                | 0.98550421                |
| PeriodT1:PeriodT8 | 0.04904015  | -0.8793511                | 0.91660039                |
| PeriodT2:PeriodT8 | 0.43357102  | -0.0532153                | 0.84537966                |
| PeriodT3:PeriodT8 | 0.81531877  | 0.52616635                | 0.95047219                |
| PeriodT4:PeriodT8 | 0.78018085  | 0.53527346                | 0.93517763                |
| PeriodT5:PeriodT8 | 0.92159991  | 0.76446734                | 0.98884355                |
| PeriodT6:PeriodT8 | 0.92546987  | 0.77807902                | 0.98505228                |
| PeriodT7:PeriodT8 | 0.91430631  | 0.73417398                | 0.98550421                |
| PeriodT8:PeriodT8 | 0.99903806  | 1                         | 1                         |

## **Captions of Supplementary data files 1-3**

**Supplementary Data 1:** Detailed results of statistical analysis of behavioral data and adult hippocampal neurogenesis. Data related to Figures 3-4 and S2.

**Supplementary Data 2:** Lists of differentially methylated cytosines between ENR and STD mice (sheet 1), differentially methylated cytosines between ENR-STD and STD (sheet 2) and list of ENR-induced differentially methylated cytosines maintained after withdrawal from ENR (sheet 3). Data related to Figures 5 and S5.

**Supplementary Data 3:** R code for mixed linear models and repeatability calculation related to results in Figures 2-4.
